# Supplementary material for: In situ growth of Ni–Fe alloy on graphene-like MoS2 for catalysis of hydrazine oxidation
Source: Royal Society of Chemistry journal article supplement (doi:10.1039/c2jm32427j), 2012-01-01
Supplement: c2jm32427j.pdf [file c2jm32427j.pdf]

Electronic Supplementary Information (ESI)

## ***In situ* Growth of Ni-Fe Alloy on Graphene-like MoS<sub>2</sub> for Catalysis of Hydrazine Oxidation**

**Xing Zhong, Haidong Yang, Shujing Guo, Shuwen Li, Galian Gou, Zhengping Dong, Yaojie**

**Lei, Jun Jin, Rong Li and Jiantai Ma\***

State Key Laboratory of Applied Organic Chemistry (SKLAOC), College of Chemistry and Chemical Engineering,  
Lanzhou University, Lanzhou, 730000, R. P. China.

E-mail: [majiantai@lzu.edu.cn](mailto:majiantai@lzu.edu.cn); Fax: +86-931-891-2582; Tel: +86-931-891-2577

### **Experimental Section**

#### **Materials**

Graphene sheets (95%) were purchased from Nanjing XFNano Materials Tech Co., Ltd, China. molybdenum disulfide (99%) was purchased from aladdin-reagent Co. Ltd. Unless otherwise stated, all chemicals were used as received without further purification. De-ionized water (18.2 M $\Omega$ ) was used throughout the experiments.

#### **Instruments**

Transmission electron microscopy (TEM) images were performed on Tecnai G2 F30 electron microscope operating at 100 kV. XRD data was obtained by a XPERT-PRO X-ray diffractometer using Cu K  $\alpha$  radiation. Atomic force microscope (AFM) images were obtained by a Agilent 5500 SPM systems with tapping mode. Scanning electron microscopy (SEM) images were performed on JSM-6701F. Raman spectra were obtained by inVia Reinshaw confocal spectroscopy with 514 nm laser excited. To study the electrocatalytic characteristics of Ni-Fe/MoS<sub>2</sub> hybrid, a conventional three-electrode system was used at 50°C throughout this work. A GC electrode (3 mm in diameter) served as the working electrode, a platinum wire and a saturated calomel electrode (SCE) were used as the counter electrode and the reference electrode, respectively. The electrolyte was 0.1 M hydrazine hydrate/0.015 M NaOH which had been purged with N<sub>2</sub> for 10min prior to the experiment. CV scans were recorded using CHI660C Electrochemical analyzer (CHI Instrument Corp. Shanghai).

#### **The details of graphene-like MoS<sub>2</sub> preparation**

According to the literature<sup>1</sup>: 30 mg of MoS<sub>2</sub> powder was added to 25 mL flasks. 10 mL of

ethanol/water with EtOH volume of 45% was added as dispersion solvent. The sealed flask was sonicated for 8 h, and then the dispersion was centrifuged at 3000 rpm for 20 mins to remove aggregates. The supernatant was collected and the concentration of MoS<sub>2</sub> in 45% ethanol/water was estimated to be 0.02mg mL<sup>-1</sup>. The prepared dispersion of graphene-like MoS<sub>2</sub> was centrifuged to 0.2mg ml<sup>-1</sup>, and then 10 uL of this MoS<sub>2</sub> suspension was dropwise added to a GC electrode (3 mm in diameter) which was served as the working electrode.

### The details of DC electroplating

An electrochemical cell with a two-electrode configuration was used for the experiments. A copper plate (50mm×10mm×1mm) was used as the cathode and a glass carbon electrode (3mm) which loaded the materials used as anode. The two electrodes were placed into a cell using NiSO<sub>4</sub>·6H<sub>2</sub>O and FeSO<sub>4</sub>·7H<sub>2</sub>O as plating solution at 50°C. After plating 5 seconds, the electrode was washed with deionized water and then dried.

### Nickel iron DC electroplating formula

Nickel(II) sulfate 250g/l

Iron(II) sulfate 25.6g/l

Boric acid 40g/l

Sodium chloride 25g/l

Saccharim 2g/l

Sodium citrate 14.7g/l

Ascorbic acid 0.5g/l

2-Butyne-1,4-diol 0.6g/l

Sodium dodecylbenzenesulphonate 0.05g/l

### Table S1

The compositions of the Ni-Fe alloy catalysts derived from inductively coupled plasma spectra (ICP)

| The concentration of Nickel(II) sulfate (g/L) | The quality of Iron(II) sulfate (g/L) | The compositions of the most active catalysts |
|-----------------------------------------------|---------------------------------------|-----------------------------------------------|
| 250                                           | 0                                     | Ni <sub>100</sub> Fe <sub>0</sub>             |
| 250                                           | 20                                    | Ni <sub>90</sub> Fe <sub>10</sub>             |
| 250                                           | 30                                    | Ni <sub>80</sub> Fe <sub>20</sub>             |
| 250                                           | 40                                    | Ni <sub>70</sub> Fe <sub>30</sub>             |
| 250                                           | 60                                    | Ni <sub>60</sub> Fe <sub>40</sub>             |
| 0                                             | 100                                   | Ni <sub>0</sub> Fe <sub>100</sub>             |

## HRTEM

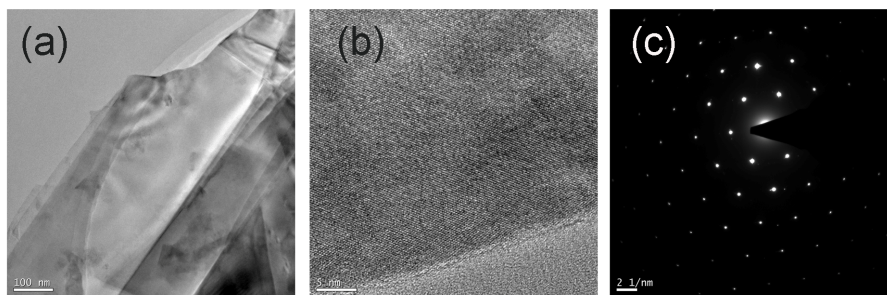

**Fig. S1** (a) HRTEM image of the graphene like MoS<sub>2</sub>. Scale bar is 100 nm; (b) HRTEM image of the graphene like MoS<sub>2</sub>. Scale bar is 5 nm; (c) The SAED pattern of the graphene like MoS<sub>2</sub>.

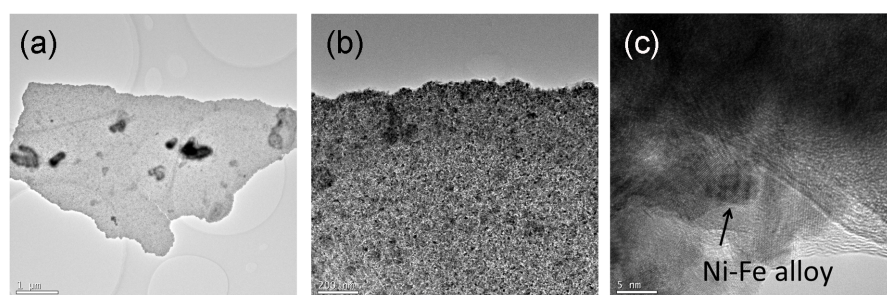

**Fig. S2** (a) HRTEM image of the Ni-Fe/MoS<sub>2</sub>. Scale bar is 1 μm; (b) HRTEM image of the Ni-Fe/MoS<sub>2</sub> hybrid. Scale bar is 200 nm; (c) HRTEM image of the Ni-Fe/MoS<sub>2</sub> hybrid. Scale bar is 5 nm.

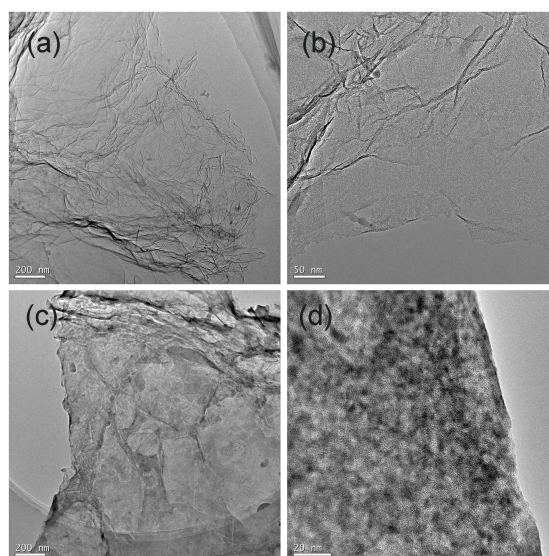

**Fig. S3** (a) HRTEM image of graphene. Scale bar is 200 nm; (b) HRTEM image of graphene. Scale bar is 50 nm; (c) HRTEM image of the Ni-Fe/graphene. Scale bar is 200 nm; (d) HRTEM image of the Ni-Fe/graphene. Scale bar is 20 nm.

## AFM

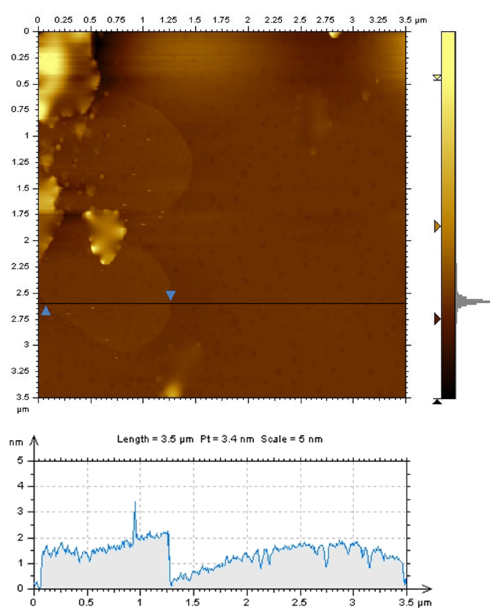

Fig. S4 AFM image of the graphene-like MoS<sub>2</sub>.

## Raman

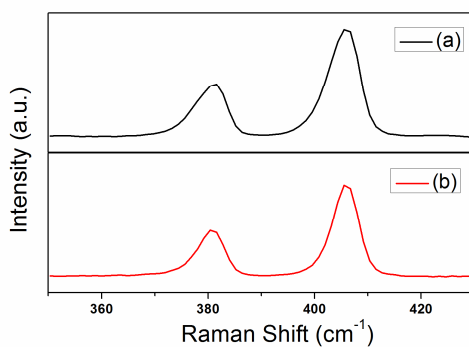

Fig. S5 Raman spectra of (a) MoS<sub>2</sub>; (b) the Ni<sub>80</sub>Fe<sub>20</sub>/MoS<sub>2</sub>.

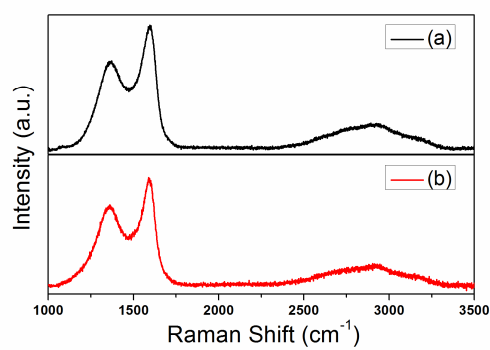

Fig. S6 Raman spectra of (a) graphene; (b) the Ni<sub>80</sub>Fe<sub>20</sub>/graphene.

## Cyclic voltammetry

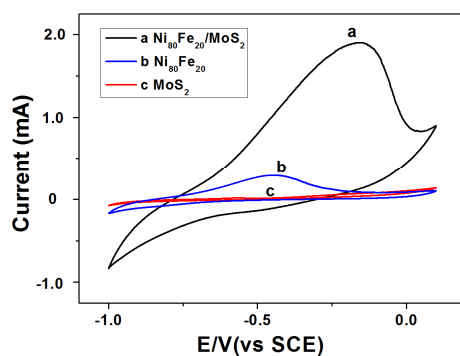

**Fig. S7** Cyclic voltammetry measurements of (a) the  $\text{Ni}_{80}\text{Fe}_{20}/\text{MoS}_2$  hybrid; (b) the  $\text{Ni}_{80}\text{Fe}_{20}$  hybrid; (c) the graphene-like  $\text{MoS}_2$  at a scan rate of  $100 \text{ mV s}^{-1}$ .

## Chronoamperometric measurement

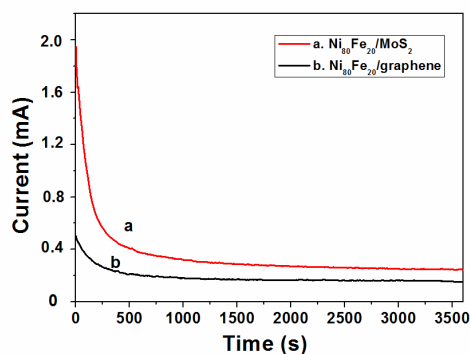

**Fig. S8** Chronoamperometric measurement in  $0.025 \text{ M NaOH}$  and  $0.1 \text{ M hydrazine hydrate}$  at  $-0.4 \text{ V}$ . (a) the  $\text{Ni}_{80}\text{Fe}_{20}/\text{MoS}_2$  hybrid; (b) the  $\text{Ni}_{80}\text{Fe}_{20}/\text{graphene}$  hybrid.

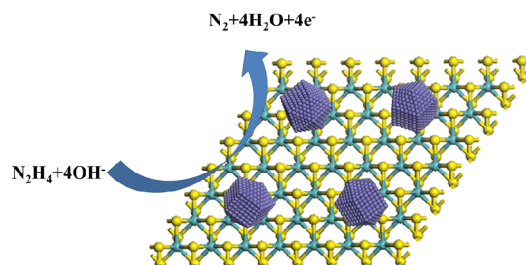

**Scheme S1** Schematic illustration of the mechanism for the  $\text{Ni-Fe}/\text{MoS}_2$  hybrid have superior electrocatalytic activity for hydrazine electrooxidation is proposed.

The mechanism for the  $\text{Ni-Fe}/\text{MoS}_2$  hybrid have superior electrocatalytic activity for hydrazine electrooxidation is proposed. The catalytic activity of  $\text{MoS}_2$  originated from the sulfur

edges while the graphene-like MoS<sub>2</sub> have more active edges than bulk MoS<sub>2</sub>. The two N atoms of N<sub>2</sub>H<sub>4</sub> could coordinate with Ni-Fe alloy nanoparticles to form N(ad), and the edges of the nanosized MoS<sub>2</sub> crystallites also could promote the dissociation of N<sub>2</sub>H<sub>4</sub> and adsorbed hydrogen atom at the catalytic edge site, thereby accelerate the production of H<sub>2</sub>O.<sup>2-4</sup>

From another perspective, graphene-like MoS<sub>2</sub> as prepared is a n-type semiconductor.<sup>5-6</sup> Consequently, electron is preferred to transfer in it. Moreover, electron can be acted as a strong oxidating reagent. In contrary, graphene preferred to transfer p-type carriers,<sup>7</sup> which is not helpful for the oxidation.

This feature indicated that a notable synergistic effects of Ni-Fe alloy and graphene-like MoS<sub>2</sub> would be contribute to enhance the catalytic activity.

## References:

1. K. G. Zhou, N. N. Mao, H. X. Wang, Y. Peng and H. L. Zhang, *Angew. Chem. Int. Ed.*, 2011, **50**, 10839-10842.
2. T. F. Jaramillo, K. P. Jorgensen, J. Bonde, J. H. Nielsen, S. Horch and I. Chorkendorff, *Science*, 2007, 317, 100-102.
3. Q. Xiang, J. Yu and M. Jaroniec, *J. Am. Chem. Soc.*, 2012, 134, 6575-6578.
4. P. Ge, M. D. Scanlon, P. Peljo, X. Bian, H. Vubrel, A. O'Neill, J. N. Coleman, M. Cantoni, X. Hu, K. Kontturi, B. Liu and H. H. Girault, *Chem. Commun*, 2012, Advance Article. DOI: 10.1039/C2CC31398G
5. J. N. Coleman, M. Lotya, A. O'Neill, S. D. Bergin, P. J. King, U. Khan, K. Young, A. Gaucher, S. De, R. J. Smith, I. V. Shvets, S. K. Arora, G. Stanton, H. Y. Kim, K. Lee, G. T. Kim, G. S. Duesberg, T. Hallam, J. J. Boland, J. J. Wang, J. F. Donegan, J. C. Grunlan, G. Moriarty, A. Shmeliov, R. J. Nicholls, J. M. Perkins, E. M. Grieveson, K. Theuvsissen, D. W. McComb, P. D. Nellist and V. Nicolosi, *Science*, 2011, 331, 568-571.
6. B. Radisavljevic, M. B. Whitwick and A. Kis, *ACS Nano*, 2011, 5, 9934-9938.
7. D. Li, M. B. Muller, S. Gilje, R. B. Kaner and G. G. Wallace, *Nat. Nanotechnol.*, 2008, 3, 101-105.
